# Supplementary material for: Genome-wide association mapping in winter barley for grain yield and culm cell wall polymer content using the high-throughput CoMPP technique
Source: PLoS One. 2017 Mar 16;12(3):e0173313. doi: 10.1371/journal.pone.0173313 (PMC5354286; doi:10.1371/journal.pone.0173313)
Supplement: S3 Table — (XLSX) [file pone.0173313.s004.xlsx]

## Sheet: Sheet1
S3 Table. Summary statistics for BLUPS grouped by row type. a2r: two-rowed genotypes b6r: six-rowed genotypes In orange background traits where two- and six-rowed significanlty differ at the p < 0.001 level. In grey background traits where significant difference is at the p < 0.05 level.
	2009						2010
Trait	min		mean		max		min		mean		max
	2ra	6rb	2r	6r	2r	6r	2r	6r	2r	6r	2r	6r
GYLD (t/ha)	2.06	2.43	3.23	3.31	4.23	4.32	4.05	4.72	6.6	7.06	8.5	9.41
SYLD (t/ha)	5.51	5.52	5.85	5.87	6.29	6.34	10.05	9.34	11.53	11.56	14.41	14.71
LM6	23.31	24.02	28.45	27.03	35.09	29.74	19.81	19.58	21.66	21.06	23.85	22.19
BS-400-3	53.63	52.79	55.44	55.09	58.44	57.57	46.5	46.13	48.36	48.21	49.93	50.69
JIM13	18.13	18.15	18.93	18.81	19.49	19.52	17.65	17.54	18.38	18.25	19.07	19.08
LM11	59.12	58.54	61.48	61.18	63.5	62.62	-	-	-	-	-	-
CBM3a	-	-	-	-	-	-	16.6	16.61	16.76	16.77	16.99	16.96
